# Supplementary material
Source: PubMed Central journal article supplement (PMC4168358)
Supplement: gf542sup_10-1055-s-0032-1327853.pdf [file gf542sup_10-1055-s-0032-1327853.pdf]

# Partnerschaft zwischen Häusern der Maximalversorgung und Häusern der Grund- und Regelversorgung in der Gynäkologie und Geburtshilfe in Deutschland

## Partnerships between Medical Centres and General Hospitals Providing Normal Care Standards in Gynaecology and Obstetrics in Germany

### Autoren

F. Schütz<sup>1</sup>, A. Maleika<sup>2</sup>, J. Poeschl<sup>3</sup>, C. Domschke<sup>4</sup>, H. Seitz<sup>5</sup>, P. Beuter-Winkler<sup>2</sup>, C. Sohn<sup>4</sup>

### Institute

<sup>1</sup> Frauenklinik, Universitätsklinikum Heidelberg, Heidelberg  
<sup>2</sup> Gynäkologie & Geburtshilfe, Krankenhaus Salem, Heidelberg  
<sup>3</sup> Universitätskinderklinik, Universitätsklinikum Heidelberg, Heidelberg  
<sup>4</sup> Universitätsfrauenklinik, Universitätsklinikum Heidelberg, Heidelberg  
<sup>5</sup> Innere Medizin, Krankenhaus Salem, Heidelberg

### Schlüsselwörter

- Gynäkologie
- Epidemiologie
- Abort

### Key words

- gynaecology
- epidemiology
- abortion

### Zusammenfassung

▼  
 Krankenhaussträger und Chefarzte sehen sich heutzutage wachsenden Anforderungen ausgesetzt. Es wird für einige kleinere Kliniken schwieriger, leitende und in Weiterbildung arbeitende ärztliche Mitarbeiter zu finden, bestimmte Gesundheitsleistungen kostendeckend anzubieten und sich in dem Konkurrenzkampf mit anderen Kliniken zu behaupten. Große Kliniken wiederum sehen sich einem immensen Investitions- und Kostendruck ausgesetzt. Kooperationen könnten eine Lösung der Probleme herbeiführen. Dabei kann zur optimalen strategischen Ausrichtung der Häuser die Leitung dieser in der Person eines gemeinsamen Chefarztes vereint werden. Die Leitung zweier Krankenhäuser birgt jedoch Risiken und Chancen zugleich. Dieser Artikel beschreibt die facettenreichen Aspekte einer Kooperation zwischen einem Haus der Maximalversorgung und einem Haus der Grund- und Regelversorgung theoretisch und aus den praktischen Erfahrungen einer gelebten Kooperation in Heidelberg.

### Abstract

▼  
 Hospital managers and the heads of medical departments are nowadays being faced with ever increasing demands. It is becoming difficult for some small hospitals to find highly experienced or even experienced medical staff, to provide specific health-care services at break-even prices and to maintain their position in competition with other hospitals. On the other hand, large hospitals are facing enormous pressure in the investment and costs fields. Cooperation could provide a solution for these problems. For an optimal strategic exploitation of the hospitals, their direction could be placed in the hands of a joint medical director. However, the directorship of two hospitals is associated both with opportunities and with risks. The present article illustrates the widely differing aspects of the cooperation between a medical centre and a general hospital providing standard care from both a theoretical point of view and on the basis of practical experience with an actual cooperation of this type in Heidelberg.

eingereicht 19. 7. 2012

revidiert 3. 9. 2012

akzeptiert 3. 9. 2012

### Bibliografie

**DOI** <http://dx.doi.org/10.1055/s-0032-1327853>  
 Geburtsh Frauenheilk 2012; 72:  
 1–5 © Georg Thieme Verlag KG  
 Stuttgart · New York ·  
 ISSN 0016-5751

### Korrespondenzadresse

**PD Dr. med. Florian Schütz**  
 Universitätsklinikum Heidelberg  
 Frauenklinik  
 Voss-Straße 7–9  
 69115 Heidelberg  
 florian.schuetz@  
 med.uni-heidelberg.de

### Einleitung

▼  
 In den letzten Jahren konnte die interessierte Ärzteschaft einen bundesdeutschen Trend in der Nachbesetzung von Chefarztpositionen beobachten. In Häusern der Grund- und Regelversorgung werden frei werdende leitende Positionen nicht mehr ausgeschrieben und neu durch Bewerber besetzt, sondern von einem Chefarzt oder Klinikdirektor eines benachbarten Hauses der Maximalversorgung mit betreut [1–3]. Es entsteht eine Partnerschaft zwischen 2 Kliniken, die in der Regel eigentlich im Wettbewerb zueinander stehen. Die unterschiedliche Trägerschaft der Kliniken kann hierbei unangetastet bleiben, kann

im Einzelfall möglicherweise auch in einer Hand liegen.

Wenn die ärztliche Leitung zweier Kliniken in der Hand eines Chefarztes liegt, die Trägerschaft aber auf 2 Systeme verteilt ist, können Synergien wie Konflikte entstehen. Diese Entwicklung birgt positive und negative Aspekte, Chancen und Gefahren in sich, welche wir im folgenden Artikel theoretisch erarbeiten und aus eigenen Erfahrungen beleuchten werden.

## Allgemeine Überlegungen

### Die Kooperation

Aus der Sicht der Krankenhausträger können grundsätzlich mehrere Gründe zu einer Kooperation und gleichzeitigen ärztlichen Leitung zweier Krankenhäuser unterschiedlicher Versorgungsstufen führen:

- ▶ Wunsch des „kleineren“ Hauses nach einer strategischen Anbindung an ein Haus der Maximalversorgung zur Absicherung der Existenz,
- ▶ diagnosegerecht angepasste Patientenversorgung zum wirtschaftlichen Vorteil beider Kliniken,
- ▶ Kapazitätsausweitung im stationären Bereich,
- ▶ fehlende oder inadäquate Bewerbungen bei bereits erfolgter Ausschreibung der Chefarztposition,
- ▶ Vorbereitung einer Übernahme des kleineren Hauses durch die größere Klinik.

Vor- und Nachteile der personellen Kooperation sind auf beiden Seiten zu finden und sind in der **Tab. 1** wiedergegeben. Die Planungssicherheit und die strategische Anbindung an ein Haus der Maximalversorgung in einer Zeit der Schließung von nicht wirtschaftlich arbeitenden Krankenhäusern scheinen die größte Motivation für eine Kooperation aus der Sicht des Haus-GuRes zu sein.

Für Fächer wie Chirurgie und Innere Medizin kann es sehr sinnvoll sein, kleiner Eingriffe oder bestimmte Patienten (z. B. geriatrische an ein Haus der Grund- und Regelversorgung zu konzentrieren, um die „teuren Betten“ des Hauses der Maximalversorgung für komplexe Eingriffe (z. B. Transplantationschirurgie) oder Erstversorgungen (z. B. Herzinfarktversorgung) zu nutzen. Dies trifft für die Frauenheilkunde nicht zu, weil nahezu alle Eingriffe, abgesehen von den interdisziplinär durchzuführenden Ovarialkarzinomoperationen, an allen gynäkologischen Abteilungen durchgeführt werden. Dies führt dazu, dass alle gynäkologischen Abteilungen grundsätzlich kompetitiv zueinander aufgestellt sind. Somit ist eine Abgrenzung der Patientinnenkollektive bei einer Zusammenführung der ärztlichen Leitung zweier Häuser nur schwer möglich und meist mit Einbußen auf der einen und anderen Seite verbunden, es sei denn, es gelingt, neue Patientinnen für beide Häuser zu gewinnen.

### Der zweigeteilte Chefarzt

Elementar für die doppelte Chefarztposition ist die klare Abgrenzung der Interessenslagen der beiden Krankenhäuser. Ob eine vertrauensvolle Zusammenarbeit möglich ist, ergibt sich aus der grundsätzlichen Frage, ob beide Abteilungen gewinnbringend arbeiten müssen, oder die eine Seite auf Kosten der anderen Mehreinnahmen hat und die Verluste der anderen Seite ausgeglichen werden. Diese Frage stellt sich besonders bei unterschiedlicher Trägerschaft. Dann stehen nämlich gegebenenfalls divergierende Interessen im Raum, da der Partner gleichzeitig auch der Mitbewerber um dieselben Patientenkollektive sein kann. Klare Absprachen, die am besten schriftlich festgehalten werden, sind hier notwendig, um Interessenkonflikte gar nicht erst aufkommen zu lassen. Zu überdenken sind hier Ausgleichszahlungen, die bei einem Absinken des Case Mix in einem Haus möglich sein können.

Der zweigeteilte Chefarzt muss des Weiteren Regelungen zur Haftpflichtversicherung und zur Änderung von bestehenden Kooperationen z. B. im Rahmen von zertifizierten Teilbereichen der Klinik (Brustzentrum, Genitalzentrum, Beckenbodenzentrum, etc.) bedenken.

Ob eine höhere Belastung auch in einer vermehrten Bezahlung des 2-fachen Chefarztes mündet, bleibt einem zu bildenden Vertragwerk vorbehalten. Hierbei kommt es ganz besonders auf das Recht zur Privatliquidation und den Beamtenstatus des Chefarztes an.

### Vertretung vor Ort

Da der 2-fache Chefarzt naturgemäß nicht an 2 Orten gleichzeitig sein kann, müssen an beiden Standorten Stellvertreter eingesetzt werden, die alle Entscheidungen des Chefarztes in seiner Abwesenheit treffen können. Sie müssen die fachliche Kompetenz besitzen, knifflige geburtshilfliche und operative Probleme eigenständig lösen zu können. Dazu ist ein hoher Grad des gegenseitigen Vertrauens notwendig. In den meisten Fällen dürfte der neue Chefarzt seinen Stellvertreter mitbringen und nur selten einen Oberarzt des „alten“ Teams als Stellvertreter benennen. Die Motivation, diese Position einzunehmen, dürfte eng mit der prospektiven Karriereplanung des Oberarztes und der finanziellen Sonderhonorierung korreliert sein.

**Tab. 1** Vor- und Nachteile der personellen Partnerschaft von Krankenhäusern der Maximal- sowie Grund- und Regelversorgung.

| Vorteile für das Haus der Maximalversorgung                                                                                                                                                                                                                                                                                                                                                                                                                                                                                                                                                                                                                                                                                                                                                                                                                                                                                                                                     | Vorteile für das Haus der Grund- und Regelversorgung                                                                                                                                                                                                                                                                                                                                                                                                                                                                                                                                                                        |
|---------------------------------------------------------------------------------------------------------------------------------------------------------------------------------------------------------------------------------------------------------------------------------------------------------------------------------------------------------------------------------------------------------------------------------------------------------------------------------------------------------------------------------------------------------------------------------------------------------------------------------------------------------------------------------------------------------------------------------------------------------------------------------------------------------------------------------------------------------------------------------------------------------------------------------------------------------------------------------|-----------------------------------------------------------------------------------------------------------------------------------------------------------------------------------------------------------------------------------------------------------------------------------------------------------------------------------------------------------------------------------------------------------------------------------------------------------------------------------------------------------------------------------------------------------------------------------------------------------------------------|
| <ul style="list-style-type: none"> <li>▶ Eingrenzung der Mitbewerber</li> <li>▶ Gewinnung eines neuen Kunden, wenn bestimmte Konsiliarleistungen nun im Haus der Maximalversorgung erfolgen (z. B. Radiologie, Pathologie, Psychoonkologie, etc.)</li> <li>▶ Zugang zu „normalen“ Patientenkollektiven (z. B. zu Zwecken der Forschung oder zur Ausbildung der Assistenzärzte)</li> <li>▶ Gewinnung von Ärzten in Weiterbildung in dem kleineren Haus, welche zukünftig als niedergelassene Fachärzte zu Zuweisern beider Häuser werden könnten</li> <li>▶ Durchführung von bestimmten Eingriffen im kleineren Haus, welche im Haus der Maximalversorgung auf der Basis der teureren Kostenstruktur defizitär erbracht werden (z. B. ambulante Eingriffe)</li> <li>▶ Durchführung von bestimmten Eingriffen im Haus der Maximalversorgung, die im kleineren Haus zu organisatorischen und finanziellen Schwierigkeiten führen können (z. B. OP beim Ovarialkarzinom)</li> </ul> | <ul style="list-style-type: none"> <li>▶ Anbindung an ein großes Haus zur strategischen Ausrichtung und zur Planungssicherheit</li> <li>▶ Nischennutzung in der Kooperation einfacher, da gesamtes Fachgebiet abgedeckt wird</li> <li>▶ Anbindung und Nutzung von bestehenden Strukturen (z. B. zertifizierte Krebszentren, urogynäkologische Zentren, etc.)</li> <li>▶ Besetzung ärztlicher Stellen ggf. durch das „attraktivere“ größere Haus einfacher, da in der Regel eine höhergradige Weiterbildungsberechtigung und Initiativbewerbungen vorliegen</li> <li>▶ Ausweitung bestimmter operativer Eingriffe</li> </ul> |
| Nachteile des Hauses der Maximalversorgung                                                                                                                                                                                                                                                                                                                                                                                                                                                                                                                                                                                                                                                                                                                                                                                                                                                                                                                                      | Nachteile des kleineren Hauses                                                                                                                                                                                                                                                                                                                                                                                                                                                                                                                                                                                              |
| <ul style="list-style-type: none"> <li>▶ Teilung der Aufmerksamkeit und Arbeitszeit des Chefarztes</li> </ul>                                                                                                                                                                                                                                                                                                                                                                                                                                                                                                                                                                                                                                                                                                                                                                                                                                                                   | <ul style="list-style-type: none"> <li>▶ ggf. Einschränkung des Operationsspektrums</li> <li>▶ ggf. Senkung des Case Mix und des Case Mix Index</li> </ul>                                                                                                                                                                                                                                                                                                                                                                                                                                                                  |

Dieser Stellvertreter muss des Weiteren bei den Landesärztekammern als zur Weiterbildung befähigter Arzt angemeldet werden, um den Weiterbildungsauftrag zu gewährleisten, wenn der Chefarzt selbst im jeweils anderen Haus arbeitet.

### Ärztliches Kollegium

Die Oberärzte und Assistenzärzte der beiden Kliniken können getrennt voneinander ohne Berührungspunkte in den jeweiligen Kliniken oder auch alternativ in einem Rotationssystem in beiden Kliniken arbeiten. Dabei ist natürlich zu berücksichtigen, ob der einzelne Arzt tatsächlich das medizinische Spektrum beider Kliniken erfüllen kann (z. B. Perinatalogie im Level-1-Zentrum) und ob die Dienstteilungen (ggf. Präsenz- vs. Hintergrunddienste) vergleichbar sind [4,5].

Einem Chefarzt obliegt auch die Aufgabe der Weiterbildung. Besonders hier können Synergien greifen, da Lücken in der Ausbildung in beiden Häusern durch das jeweils andere gefüllt werden können. So kann durch ein Rotationssystem die volle Weiterbildung für alle Assistenzärzte in Weiterbildung und ggf. auch für die Schwerpunktbezeichnungen erreicht werden. Besonders in Zeiten reduzierter Bewerbungen in unserem Fachgebiet kann dies zum Vorteil des Hauses der Grund- und Regelversorgung reichen. Die Ärzte des Hauses der Maximalversorgung können jedoch auch profitieren, da die Eingriffe der Grund- und Regelversorgung, welche in hochspezialisierten Kliniken selten sein können, erlernt werden können.

### Ärztliche Haftpflichtversicherung

Der Haftpflichtversicherung müssen die veränderten Verhältnisse mitgeteilt werden. Diese muss den neuen Gegebenheiten zustimmen. Besonders wichtig erscheint, Rotationsstellen auf Stellvertreter-, Oberarzt- oder Assistenzarztebene genau zu beschreiben und prüfen zu lassen. Bei Rotationssystemen von weiterem ärztlichem Personal müssen die Haftpflichtversicherungen ebenfalls in Kenntnis gesetzt werden [6].

### Patientenzufriedenheit

Die Patienten reagieren in der Regel positiv auf die Veränderung. Sie begrüßen die modernen Standards des Hauses der Maximalversorgung im Haus der Grund- und Regelversorgung. Des Weiteren kann das Vertrauen der Patientinnen in das Haus der Grund- und Regelversorgung erhöht werden, wenn die Grundlage von Zertifizierungen (z. B. Mindestbehandlungszahlen) durch die Kooperation gegeben sind. So können auch kleinere Häuser ein Zertifikat (z. B. Brustzentrum oder Urogenitalzentrum) erhalten, die vorher dazu keine Voraussetzungen aufwiesen [7,8].

Bei einer Kapazitätsüberlastung einer der beiden Abteilungen kann des Weiteren ein Ausweichen auf die andere zu einer Lösung im Sinne der Patientin führen.

### Wirtschaftlichkeit

Die Kostenstruktur eines Krankenhauses gibt vor, ob eine medizinische Leistung gewinnbringend erbracht werden kann. Es ist bis heute bei den meisten Krankenhausträgern schwierig zu berechnen, ob sich einzelne definierte Behandlungen tatsächlich wirtschaftlich tragen. Trotzdem kann ein gutes Controlling mit dem Chefarzt erarbeiten, welche Leistung sich in dem jeweiligen Haus gar nicht lohnt. Dies muss jedoch nicht zwangsläufig in einem anderen Haus der Fall sein, da die Kostenstruktur hier eine andere sein kann. Somit muss in regelmäßigen Abständen errechnet werden, welche Leistungen in welchem Haus erbracht

werden sollen. Hierbei kann man orientierend sagen, dass die großen gynäkologischen Krebsoperationen sich im Haus der Maximalversorgung mehr rechnen als im Haus der Grund- und Regelversorgung, da hier im Allgemeinen komplexere Fälle besser von der Kapazität aufgefangen werden können. Im Haus der Grund- und Regelversorgung können in der Regel eher urogynäkologische, endoskopische, rekonstruktive Operationen oder kosmetische Operationen als Selbstzahlerleistung angeboten werden.

### Darstellung einer bestehenden Kooperation

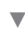

Zwischen dem Krankenhaus Salem der Evangelischen Stadtmission Heidelberg gGmbH (Krankenhaus Salem) und dem Universitätsklinikum besteht eine Kooperation der chirurgischen Abteilungen unter dem Ordinarius und Chefarzt (Prof. Dr. M. Büchler) seit 2003 [3,9]. Im Jahr 2007 wurde eine Nachfolgeregelung in der Abteilung für Gynäkologie und Geburtshilfe gesucht. Die Rationale der Kooperation ergab sich aus Sicht des Krankenhauses Salem aus der Notwendigkeit einer strategischen Positionierung. Heidelberg weist eine der niedrigsten Geburtenraten Deutschlands auf und hält trotzdem 4 gynäkologisch-geburtshilfliche Abteilungen vor. Seit Mai 2008 werden die Universitätsfrauenklinik Heidelberg und die gynäkologisch-geburtshilfliche Abteilung des Krankenhauses Salem von Prof. Dr. Christof Sohn ärztlich geleitet.

Die Universitätsfrauenklinik Heidelberg ist ein Haus der Maximalversorgung mit 103 Betten, über 5000 stationären Fällen und ca. 1400 Geburten pro Jahr. Besonders die gynäkologische Onkologie (Brustzentrum mit ca. 700 Primärfällen im Jahr) und die Perinatalogie sind als Schwerpunkte hervorzuheben (► **Abb. 4**).

Das Krankenhaus Salem ist ein akademisches Lehrkrankenhaus der Universität Heidelberg mit 238 Betten, das neben der Frauenklinik eine chirurgische, internistische, urologische und anästhesiologische Abteilung aufweist. Das Haus und die Abteilung insbesondere genossen schon immer in der Heidelberger Bevölkerung einen sehr guten Ruf. In der gynäkologisch-geburtshilflichen Abteilung werden 42 (21 gynäkologische, 18 geburtshilfliche) Betten vorgehalten. Mit Fördermitteln der Dietmar-Hopp-Stiftung wurde eine benachbart liegende Villa aus dem 19. Jahrhundert sehr aufwendig zu einer exklusiven Wöchnerinnenstation auf 3 Etagen umgebaut. Diese wurde mit Übernahme der Amtsgeschäfte eröffnet.

Unser Konzept sah folgende zentralen Punkte vor:

- Ausbau der Geburtenzahl ausgehend von ca. 700 im Jahr 2007 mit weiterhin fallender Tendenz durch konsequente Positionierung als individualisierte, familiäre Geburtshilfe unter Wahrung universitärer Standards und exklusiver Kooperationspartner.
- Ausweitung des zertifizierten Brustzentrums auf das KH Salem.
- Einrichtung einer übergreifenden Kooperation mit der chirurgischen und internistischen Abteilung zur Behandlung von Harninkontinenz und Senkungsbeschwerden.
- Durchführung von kleineren operativen Eingriffen, vaginalen und urogynäkologischen Operationen im KH Salem.
- Durchführung von gynäkologisch-onkologischen Eingriffen in der UFK mit endoskopischen Standards.
- Schaffung einer adäquaten Außendarstellung.

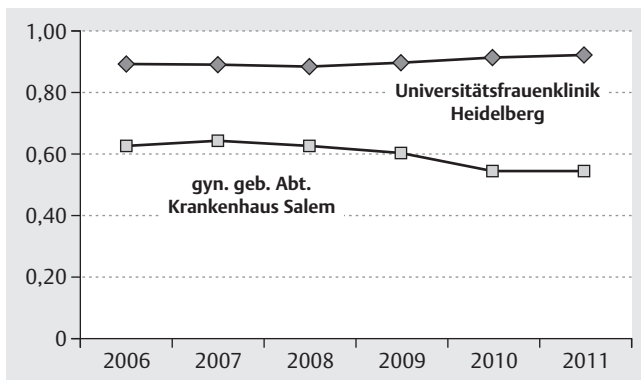

**Abb. 1** Case-Mix-Index (CMI) pro Geschäftsjahr; der Abfall im KH Salem korreliert mit der Zunahme der Geburten.

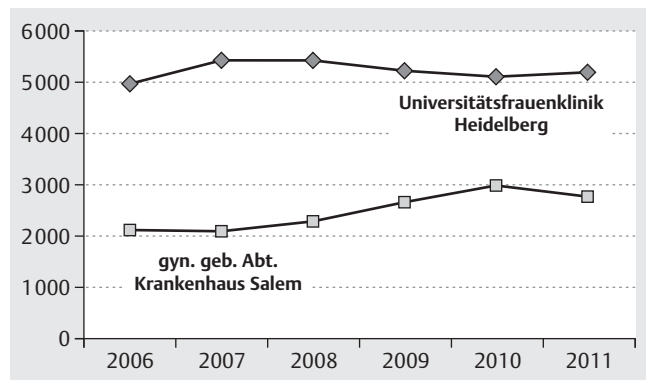

**Abb. 2** Stationäre Fälle der gynäkologisch-geburtshilflichen Abteilung pro Jahr.

Zur Optimierung der Abläufe in der Geburtshilfe wurden nach einer kurzen Beobachtungsphase die damals bestehenden Standards vollständig überarbeitet. Viele Routinen wurde hinterfragt und gemeinsam mit dem ärztlichen und dem Pflegepersonal geändert und an die Wünsche der Paare in der heutigen Zeit angepasst (Episiotomie nur bei absoluter Indikation, Nabelschnurblutabnahme, weniger invasive Maßnahmen, alternative Wege zur Geburtseinleitung, Senkung der Sectorate, ansprechendes Ambiente, späte Visiten, Babyfotografie). Die Versorgung der Neugeborenen auf der Wöchnerinstation wurde der neonatologischen Abteilung der Universitätskinderklinik (Abteilung Prof. Dr. J. Pöschl) übertragen, die auch die Notfallversorgung des Kreißsaals und das quartalsweise stattfindende Reanimationstraining des medizinischen Teams übernahm. Weiterhin werden Risikoschwangerschaften, -geburten sowie Schwangere vor der 36 + 0. SSW in der UFK betreut. Die renovierte Entbundenenvilla schaffte darüber hinaus mit großzügigen Zimmern, geschickter Aufteilung, praktischem Mobiliar, großem Bad, schönem Frühstücksraum und optimalen Voraussetzungen für das Rooming-in das Ambiente eines 4-Sterne-Hotels. Durch diese Maßnahmen kam es schnell zu einer großen Akzeptanz des neuen Konzepts, sodass die Geburten sich bis 2010 nahezu verdoppelten (1283 Geburten; ● **Abb. 3**), die Sectorate von 40% auf unter 30% sank und eine Episiotomie nur noch bei 19% der Patientinnen (zuvor 40%) geschnitten wurde.

In der operativen Gynäkologie konnte erfolgreich das zertifizierte Brustzentrum auf das Krankenhaus Salem ausgeweitet werden,

sodass alle universitären Kooperationspartner der UFK auch das Krankenhaus Salem versorgen (Pathologisches Institut, Radiologie, Strahlentherapie, Plastische Chirurgie (Berufsgenossenschaftliche Klinik Ludwigshafen), Psychoonkologie). Auch im KH Salem wurde eine Breast Care Nurse ausgebildet. Jede Patientin wird prä- und postoperativ in einem interdisziplinärem Tumorboard vorgestellt. Dadurch können diejenigen Patientinnen, welche an einem konfessionellen Haus behandelt werden möchten oder die universitäre Medizin scheuen, von dem hohen Standard eines zertifizierten Zentrums profitieren. Die Zahl der operierten Mammakarzinome blieb im KH Salem konstant.

Für die gynäkologische Onkologie wurde beschlossen, dass Patientinnen zur Diagnostik im KH Salem (Hysteroskopie, Küretagen, Konisationen, Probeexzisionen, etc.) behandelt werden, die operative Therapie der Erkrankung jedoch bei Zustimmung der Patientin in der UFK durchgeführt wird, da hier laparoskopische Verfahren und zukünftig auch robotergestützte Chirurgie angeboten werden kann. Des Weiteren ist die operative Flexibilität in der UFK größer.

In Kooperation mit der urologischen Abteilung des KH Salem wurde eine urogynäkologische Sprechstunde aufgebaut, die von einer Oberärztin geleitet wird. Viele Patientinnen werden präoperativ oder konsiliarisch von den Niedergelassenen hier oder in der Sprechstunde der Universitätsfrauenklinik vorgestellt. Operiert werden die Patientinnen aber im KH Salem durch die Urogynäkologin Frau Dr. Maleika (AGUB III), welche Oberärztin

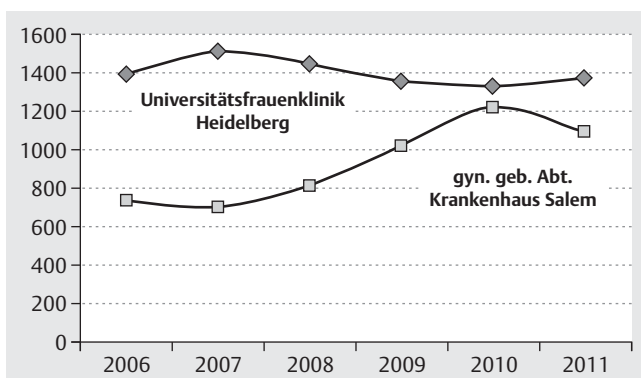

**Abb. 3** Anzahl der Geburten (Spontan- und vaginal-operative Geburten und Kaiserschnittentbindungen) pro Jahr.

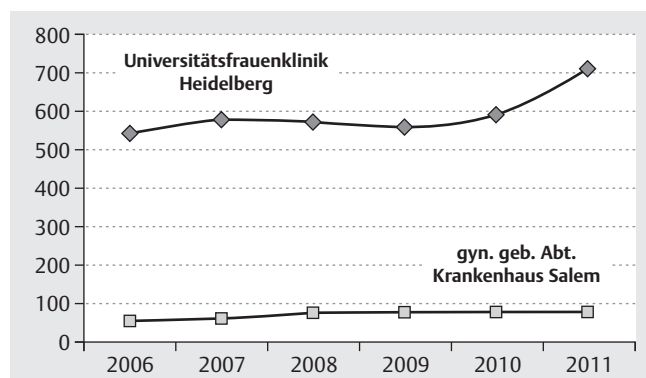

**Abb. 4** Anzahl der primären Mammakarzinome pro Jahr.



der Universitätsfrauenklinik und Chefarztstellvertreterin im KH Salem ist.

Zur Optimierung der Außendarstellung wurde durch das Medienzentrum des Universitätsklinikums ein ansprechender Internetauftritt geschaffen, dessen Inhalte von uns bereits im Vorfeld erarbeitet wurden. Die bis dato bestandenen Broschüren wurden komplett unter Mithilfe des Medienzentrums überarbeitet. Ein 2-mal im Monat stattfindender Elterninformationsabend wurde eingerichtet, der in den Arztpraxen, im Internet und in der Lokalzeitung in ansprechender Optik angekündigt wurde. Dieser Elterninformationsabend ist nicht nur gut auf die Bedürfnisse der Frauen in Heidelberg abgestimmt, sondern bezieht die Hebammen und Schwestern der Wöchnerinnenvilla mit ein, sodass sich den Paaren ein Team präsentiert, das für die gemeinsam ausgearbeitete Vision der Geburtshilfe am KH Salem steht. Letztlich besuchten die Autoren alle niedergelassenen Frauenärzte der Umgebung, um ihnen das neue Konzept zu erklären.

Eine Rotation der Assistenzärzte in Weiterbildung wurde initiiert. Erstaunlicherweise zeigt die Erfahrung, dass die Rotation zwischen beiden Häusern nicht beiderseits gleichermaßen motiviert abläuft. Die Ärzte der Frauenklinik hatten sich bewusst zur Karriereplanung für ein Haus der Maximalversorgung entschieden und stehen einem vorübergehenden Wechsel in das kleinere Haus eher skeptisch gegenüber, wohingegen die KollegInnen des Salem-Krankenhauses eine hohe Motivation zeigten, neue Erfahrungen zu sammeln. Des Weiteren wurde aus der Sicht der Universitätskliniker befürchtet, einen wissenschaftlichen Nachteil durch die Abwesenheit zu erfahren.

## Diskussion

Unserem Fach der Gynäkologie und Geburtshilfe stehen schwierige Zeiten bevor. Viele Abteilungen weisen sinkende Fallzahlen vor allem in der Geburtshilfe auf. Neue Konzepte sind also gefragt, um diesem Trend zu begegnen, bevor eine staatliche Regulierung zum Beispiel über die Formulierung von Mindestzahlen eingreift. Kooperationen – wie die beschriebene – könnten eine Möglichkeit sein, gemeinsam diesen Trend zu durchbrechen.

Durch die Einführung neuer Diagnostik-, Operations- und systemischer Behandlungsmethoden in der gynäkologischen Onkologie wird es zu einer Zentrumsbildung kommen, auch wenn momentan noch die Meinung weit verbreitet ist, dass gynäkologische Malignome an allen Abteilungen klassisch operiert und therapiert werden können [10]. Dabei wird übersehen, dass endoskopische Verfahren, robotergestützte Chirurgie, intraoperative Strahlentherapien und spezielle systemische Therapien nicht überall aus einer Hand angeboten werden können. Trotzdem haben die Patientinnen die Bildung von spezialisierten onkologischen Zentren angenommen und bevorzugen eine Therapie in diesen [11]. Zukünftig wird es also eher verstärkt zu einer weiteren Spezialisierung in der gynäkologischen Onkologie kommen.

Des Weiteren muss sich unser Fachgebiet dort im Kanon der anderen Fächer behaupten, wo unsere Leistungen alternativ durchgeführt werden können. Dies ist z. B. in der Urogynäkologie oder der Chirurgie der Fall. Durch eine ausgewiesene Kompetenz auf dem jeweiligen Gebiet und durch einen interdisziplinären Dialog z. B. in Zentren können wir diesen Abbrüchen begegnen.

Durch die Zusammenlegung zweier Abteilungen für Gynäkologie und Geburtshilfe können diese Häuser strategisch innerhalb einer Region ausgerichtet werden, sodass beide Abteilungen wei-

terexistieren können. In Heidelberg resultierte dieses Vorgehen in einer Stimulierung beider Kliniken. Die Geburtenzahlen im KH Salem stiegen durch neue Standards, universitäre Kooperationspartner und eine gut durchdachte Öffentlichkeitsarbeit an, ohne die Patientinnenkollektive der auf Risikogeburtshilfe spezialisierten UFK zu beanspruchen. In der Gynäkologie konnten vermehrt gynäkologische Malignome für die UFK rekrutiert werden. So blieben in beiden Häusern die Case-Mix-Indices stabil bei steigenden Fallzahlen (Abb. 1 und 2). Sicherlich hätten einige der Entwicklungen auch ohne die Kooperation stattfinden können (z. B. steigende Geburtenzahlen durch die renovierte Entbundenenvilla im KH Salem; steigende Zahlen in der gynäkologischen Onkologie in der UFK). Allerdings ist fraglich, ob diese Entwicklung ohne die zusätzlichen unterstützenden Synergismen (exklusive Kooperation mit der Universitätskinderklinik; Strukturierung der Patientinnenkollektive) ebenso effektiv gewesen wäre. Zahlreiche Entwicklungen wären auf jeden Fall überhaupt nicht möglich gewesen.

Einschränkend müssen wir die teilweise kritische Sichtweise bei einigen niedergelassenen Frauenärzten feststellen, die weniger Patientinnen als früher in beide Häuser einwiesen. Diese scheint vor allem aus der Befürchtung entstanden zu sein, dass die universitäre Medizin eine zu große Dominanz in der Region entwickelt. Eine verantwortungsbewusste, menschliche und hochqualitative Behandlung unserer Patientinnen wird hoffentlich in der Zukunft auch diese Kolleginnen und Kollegen von der Sinnhaftigkeit der Partnerschaft überzeugen.

## Interessenkonflikt

Nein.

## Literatur

- 1 Metzelder ML, Engelmann C, Bottländer M et al. Cooperation model between an university clinic and a peripheral paediatric surgical department. *Zentralbl Chir* 2008; 133: 559–561
- 2 Egger B, Schmid SW, Schäfer M et al. 2-year evaluation of a cooperation model between a surgical university clinic and a general hospital. *Chirurg* 2001; 72: 30–36
- 3 Welsch T, von Frankenberg M, Simon T et al. Hospital cooperation models. Safeguarding optimized patient care, medical training and resource utilization. *Chirurg* 2012; 83: 274–279
- 4 Mautner E et al. Medical and psychosocial risk factors for depression and decreased quality of life in pregnancy and postpartum. *Geburtsh Frauenheilk* 2010; 70: 298–303
- 5 Billmann MK, Rath W, Beinder E. Pregnancies at an advanced maternal age: results from Zurich and review of the literature. *Geburtsh Frauenheilk* 2010; 70: 273–280
- 6 Hellmers C, Krahl A, Schucking B. Decisions in the delivery room: how do obstetricians come to their decisions? *Geburtsh Frauenheilk* 2010; 70: 553–560
- 7 Strauss A et al. Emergencies in obstetrics. *Geburtsh Frauenheilk* 2010; 70: R22–R36
- 8 Diedrich K, Strowitzki T, Kantenich H. Position paper – current state of reproductive medicine in Germany. *Geburtsh Frauenheilk* 2010; 70: 355–360
- 9 von Frankenberg M, Schmitz-Winnenthal H, Bornemann T et al. [Project “Partnership” – university surgical departments and hospitals for basic and regular medical care. Directing cooperation for the future]. *Chirurg* 2007; 78: 368–373
- 10 Lux MP, Fasching PA, Loehberg CR et al. Health services research and health economy – quality care training in gynaecology, with focus on gynaecological oncology. *Geburtsh Frauenheilk* 2011; 71: 1046–1055
- 11 Lux MP, Fasching PA, Bani MR et al. Marketing of breast and perinatal centers – are patients familiar with the product “specialized centers and certification”? *Geburtsh Frauenheilk* 2009; 69: 321–327
